# Supplementary material for: Multiple Rad52-Mediated Homology-Directed Repair Mechanisms Are Required to Prevent Telomere Attrition-Induced Senescence in Saccharomyces cerevisiae
Source: PubMed Central journal article supplement (PMC4948829; doi:10.1371/journal.pgen.1006176), 2016-07-18
Supplement: pgen.1006176.s002.pdf [file pgen.1006176.s002.pdf]

|                                                |                                                                                   | <b>Telomere length (bp)</b> | <b>Clones sequenced</b> | <b>Divergent sequences</b> | <b>Percent</b> |
|------------------------------------------------|-----------------------------------------------------------------------------------|-----------------------------|-------------------------|----------------------------|----------------|
| Plasmid cloned                                 | 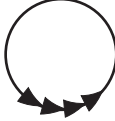 | 166                         | 67                      | 3                          | 4.5            |
|                                                |                                                                                   | 213                         | 63                      | 2                          | 3.2            |
|                                                |                                                                                   | 166 + 213                   | 130                     | 5                          | 3.8            |
| Internally integrated in WT                    |  | 166                         | 123                     | 5                          | 4.1            |
|                                                |                                                                                   | 230                         | 138                     | 6                          | 4.3            |
|                                                |                                                                                   | 166 + 230                   | 261                     | 11                         | 4.2            |
| Internally integrated in <i>rad52Δ</i> mutants |  | 166                         | 175                     | 13                         | 7.4            |
|                                                |                                                                                   | 230                         | 169                     | 12                         | 7.1            |
|                                                |                                                                                   | 166 + 230                   | 344                     | 25                         | 7.3            |

**Figure S2. Measuring sequence divergence after PCR amplification, cloning and sequencing of telomere sequences of defined length.** Two plasmids containing telomeres sequences, 166 bp and 213 bp in length, were amplified by PCR, re-cloned into the same vector, and sequenced. Two telomeres, 166 bp and 230 bp in length, were also inserted at the *URA3* locus in wild-type and *rad52Δ* strains. The resulting strains were clonally propagated for ~30 population doublings, and the inserted telomeres were then amplified by PCR, cloned, and sequenced. Sequence divergence was determined using the same rules for the identification of divergent sequences amplified from a specific telomere (i.e. telomere VI-R) from a population of cells (see Materials and Methods).
