# Supplementary material for: Multiple Rad52-Mediated Homology-Directed Repair Mechanisms Are Required to Prevent Telomere Attrition-Induced Senescence in Saccharomyces cerevisiae
Source: PubMed Central journal article supplement (PMC4948829; doi:10.1371/journal.pgen.1006176), 2016-07-18
Supplement: pgen.1006176.s003.pdf [file pgen.1006176.s003.pdf]

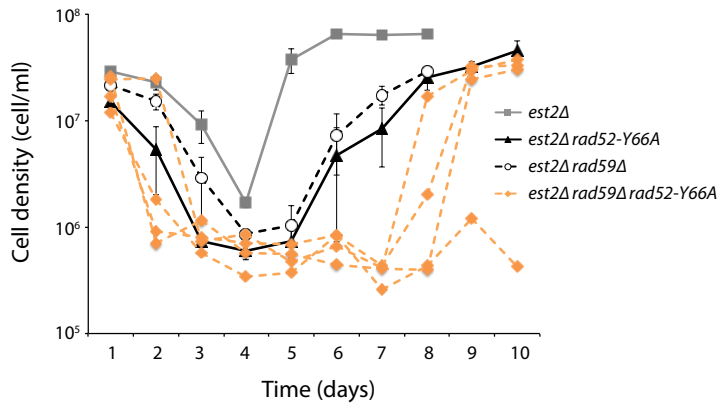

**Figure S3. *est2Δ rad52-Y66A rad59Δ* mutants are delayed in forming survivors.** The graph is the same as Figure 4C, except that the data are plotted in “Days” on the x-axis instead of “Population Doublings”. In addition, the independent *est2Δ rad52-Y66A rad59Δ* replicates are plotted instead to highlight the delay/defect in survivor formation.
