# Supplementary material for: Multiple Rad52-Mediated Homology-Directed Repair Mechanisms Are Required to Prevent Telomere Attrition-Induced Senescence in Saccharomyces cerevisiae
Source: PubMed Central journal article supplement (PMC4948829; doi:10.1371/journal.pgen.1006176), 2016-07-18
Supplement: pgen.1006176.s004.pdf [file pgen.1006176.s004.pdf]

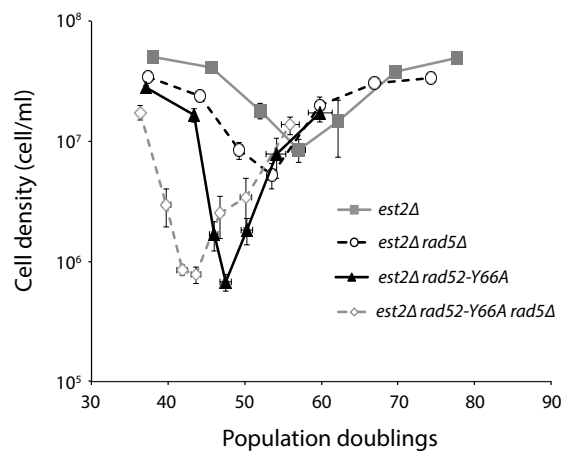

**Figure S4. Rad52 and Rad5 function in separate pathways to delay senescence.** Senescence rates were measured by serial passaging of *est2Δ* (n = 6), *est2Δ rad5Δ* (n = 16), *est2Δ rad52-Y66A* (n = 11) and *est2Δ rad5Δ rad52-Y66A* (n = 8) strains, derived from the sporulation of CCY159, in liquid culture. Cell density was measured each day after 24 h of growth in liquid culture, followed by dilution to  $2 \times 10^5$  cells/ml. Mean  $\pm$  SE for each genotype is shown.
