# Supplementary material for: Multiple Rad52-Mediated Homology-Directed Repair Mechanisms Are Required to Prevent Telomere Attrition-Induced Senescence in Saccharomyces cerevisiae
Source: PubMed Central journal article supplement (PMC4948829; doi:10.1371/journal.pgen.1006176), 2016-07-18
Supplement: pgen.1006176.s006.pdf [file pgen.1006176.s006.pdf]

A

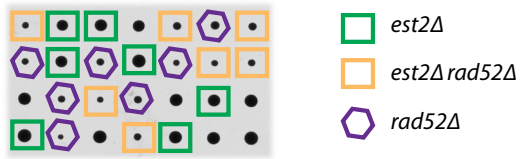

B

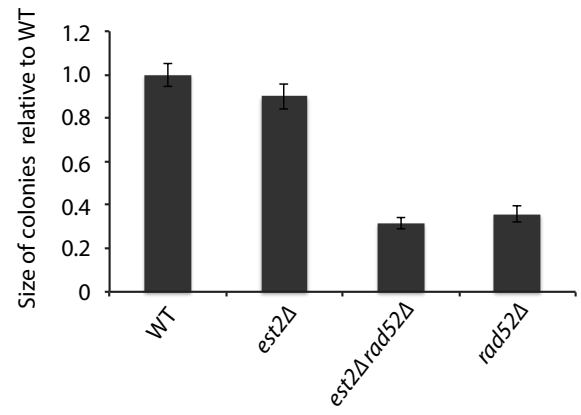

**Figure S6. Deletion of *RAD52* does not affect cell growth early after the loss of telomerase.** (A) Representative tetrads derived from the sporulation of CCY16 are shown. (B) Colony sizes were measured for each genotype and normalized to wild type. Mean  $\pm$  SE is shown.
